# Supplementary material for: Sleep in the Supine Position During Pregnancy is Associated with Fetal Cerebral Redistribution
Source: MDPI journal article supplement (doi:10.3390/jcm9061773), 2020-06-07
Supplement: s1 [file s1]

# Supplementary Materials: Sleep in the Supine Position During Pregnancy is Associated with Fetal Cerebral Redistribution

Table S1. Sleep questionnaire.

| Question                                                       |            | Possible responses                                            |
|----------------------------------------------------------------|------------|---------------------------------------------------------------|
| Position on going to sleep before you were pregnant?           | Front      | No / Yes / Rarely (<10%) / Sometimes (10–50%) / Mostly (>50%) |
|                                                                | Back       | No / Yes / Rarely (<10%) / Sometimes (10–50%) / Mostly (>50%) |
|                                                                | Left side  | No / Yes / Rarely (<10%) / Sometimes (10–50%) / Mostly (>50%) |
|                                                                | Right side | No / Yes / Rarely (<10%) / Sometimes (10–50%) / Mostly (>50%) |
|                                                                | Unsure     | No / Yes                                                      |
| Position on going to sleep in the past one month of pregnancy? | Front      | No / Yes / Rarely (<10%) / Sometimes (10–50%) / Mostly (>50%) |
|                                                                | Back       | No / Yes / Rarely (<10%) / Sometimes (10–50%) / Mostly (>50%) |
|                                                                | Left side  | No / Yes / Rarely (<10%) / Sometimes (10–50%) / Mostly (>50%) |
|                                                                | Right side | No / Yes / Rarely (<10%) / Sometimes (10–50%) / Mostly (>50%) |
|                                                                | Unsure     | No / Yes                                                      |
| Position on going to sleep in the past one week of pregnancy?  | Front      | No / Yes / Rarely (<10%) / Sometimes (10–50%) / Mostly (>50%) |
|                                                                | Back       | No / Yes / Rarely (<10%) / Sometimes (10–50%) / Mostly (>50%) |
|                                                                | Left side  | No / Yes / Rarely (<10%) / Sometimes (10–50%) / Mostly (>50%) |
|                                                                | Right side | No / Yes / Rarely (<10%) / Sometimes (10–50%) / Mostly (>50%) |
|                                                                | Unsure     | No / Yes                                                      |
| Position on going to sleep during last night?                  | Front      | No / Yes / Rarely (<10%) / Sometimes (10–50%) / Mostly (>50%) |
|                                                                | Back       | No / Yes / Rarely (<10%) / Sometimes (10–50%) / Mostly (>50%) |
|                                                                | Left side  | No / Yes / Rarely (<10%) / Sometimes (10–50%) / Mostly (>50%) |
|                                                                | Right side | No / Yes / Rarely (<10%) / Sometimes (10–50%) / Mostly (>50%) |
|                                                                | Unsure     | No / Yes                                                      |
| Position on waking up before you were pregnant?                | Front      | No / Yes / Rarely (<10%) / Sometimes (10–50%) / Mostly (>50%) |
|                                                                | Back       | No / Yes / Rarely (<10%) / Sometimes (10–50%) / Mostly (>50%) |
|                                                                | Left side  | No / Yes / Rarely (<10%) / Sometimes (10–50%) / Mostly (>50%) |
|                                                                | Right side | No / Yes / Rarely (<10%) / Sometimes (10–50%) / Mostly (>50%) |
|                                                                | Unsure     | No / Yes                                                      |
| Position on waking up in the past one month of pregnancy       | Front      | No / Yes / Rarely (<10%) / Sometimes (10–50%) / Mostly (>50%) |
|                                                                | Back       | No / Yes / Rarely (<10%) / Sometimes (10–50%) / Mostly (>50%) |
|                                                                | Left side  | No / Yes / Rarely (<10%) / Sometimes (10–50%) / Mostly (>50%) |
|                                                                | Right side | No / Yes / Rarely (<10%) / Sometimes (10–50%) / Mostly (>50%) |
|                                                                | Unsure     | No / Yes                                                      |
| Position on waking up in the past one week of pregnancy?       | Front      | No / Yes / Rarely (<10%) / Sometimes (10–50%) / Mostly (>50%) |
|                                                                | Back       | No / Yes / Rarely (<10%) / Sometimes (10–50%) / Mostly (>50%) |
|                                                                | Left side  | No / Yes / Rarely (<10%) / Sometimes (10–50%) / Mostly (>50%) |
|                                                                | Right side | No / Yes / Rarely (<10%) / Sometimes (10–50%) / Mostly (>50%) |
|                                                                | Unsure     | No / Yes                                                      |
| Position on waking up during last night                        | Front      | No / Yes / Rarely (<10%) / Sometimes (10–50%) / Mostly (>50%) |
|                                                                | Back       | No / Yes / Rarely (<10%) / Sometimes (10–50%) / Mostly (>50%) |
|                                                                | Left side  | No / Yes / Rarely (<10%) / Sometimes (10–50%) / Mostly (>50%) |
|                                                                | Right side | No / Yes / Rarely (<10%) / Sometimes (10–50%) / Mostly (>50%) |
|                                                                | Unsure     | No / Yes                                                      |

**Table S2.** Maternal demographics by cerebral redistribution.

| Variable                                                      | CPR < 10th centile<br><i>n</i> =20 (7.3%) | CPR > 10th centile<br><i>n</i> =254 (92.7%) | p value |
|---------------------------------------------------------------|-------------------------------------------|---------------------------------------------|---------|
| Maternal age (mean, SD) †                                     | 31.4 (2.1)                                | 31.4 (4.3)                                  | 0.97    |
| Gestational age at ultrasound assessment (weeks) (mean, SD) † | 36.3 (1.0)                                | 36.4 (0.7)                                  | 0.55    |
| Maternal booking BMI (median, IQR) ‡                          | 24.99 (22.02–28.81)                       | 23.18 (21.09–27.13)                         | 0.03    |
| Ethnicity¶                                                    |                                           |                                             |         |
| Caucasian                                                     | 55% (11/20)                               | 62.6% (159/254)                             | 0.74    |
| ATSI                                                          | 0                                         | 1.2% (3/254)                                |         |
| Asian                                                         | 15% (3/20)                                | 15.4% (39/254)                              |         |
| Indian                                                        | 15% (3/20)                                | 10.6% (27/254)                              |         |
| Other                                                         | 15% (3/20)                                | 10.2% (26/254)                              |         |
| Parity§                                                       |                                           |                                             |         |
| Nulliparous                                                   | 20.0% (4/20)                              | 42.1% (107/254)                             | 0.052   |
| Multiparous                                                   | 80.0% (16/20)                             | 57.9% (147/254)                             |         |
| Smoking§                                                      | 20.0% (4/20)                              | 27.6% (70/254)                              | 0.46    |
| Hypertension¶                                                 | 10.0% (2/20)                              | 3.6% (9/252)                                | 0.19    |
| Diabetes¶                                                     | 25.0% (5/20)                              | 13.9% (35/252)                              | 0.19    |

† Student t-test; ‡ Mann-Whitney U-test; § Chi-squared test; ¶ Fisher's exact test. CPR: cerebroplacental ratio; BMI: body mass index; ATSI: Aboriginal and Torres Strait Islander; SD: standard deviation; IQR: interquartile range.

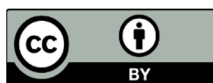

© 2020 by the authors. Licensee MDPI, Basel, Switzerland. This article is an open access article distributed under the terms and conditions of the Creative Commons Attribution (CC BY) license (<http://creativecommons.org/licenses/by/4.0/>).
